# Supplementary material for: Pharmacological targeting of the protein synthesis mTOR/4E-BP1 pathway in cancer-associated fibroblasts abrogates pancreatic tumour chemoresistance
Source: PubMed Central journal article supplement (PMC4459815; doi:10.15252/emmm.201404346), 2015-04-01

Duluc et al. Figure 4

A

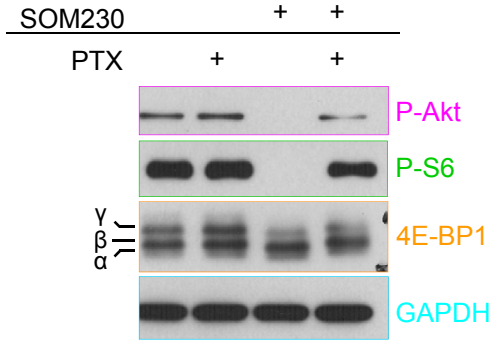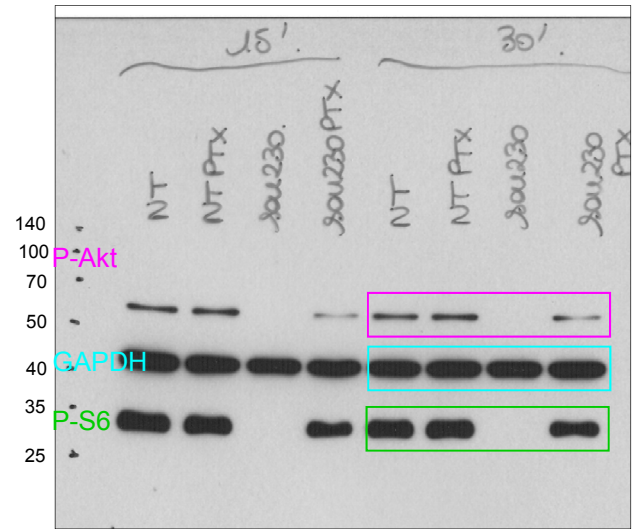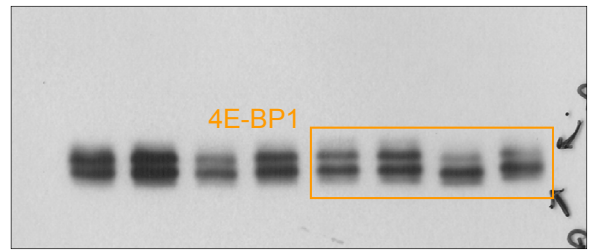

B

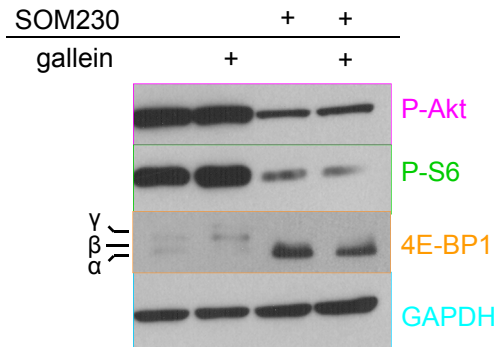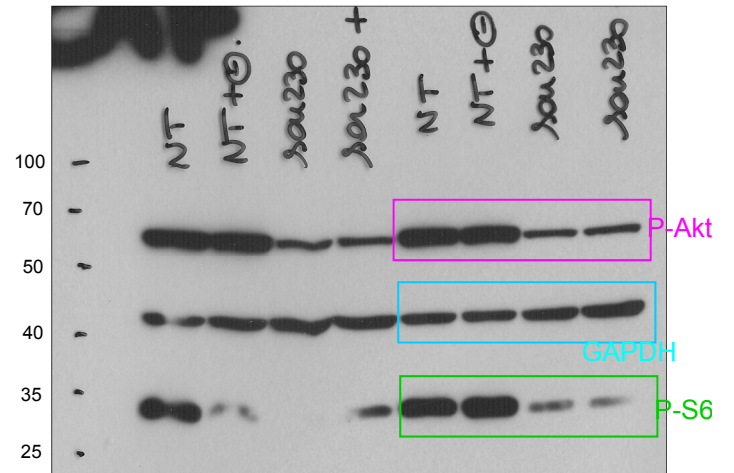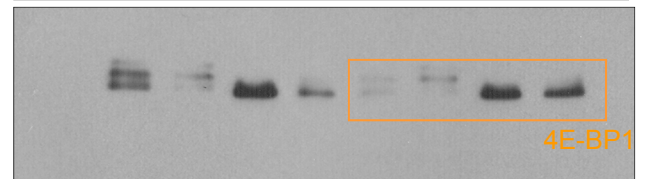

C

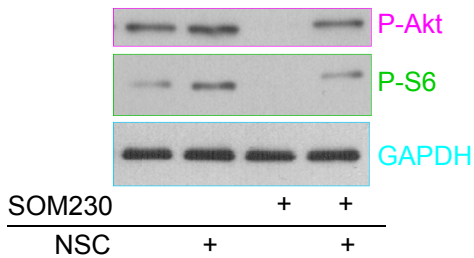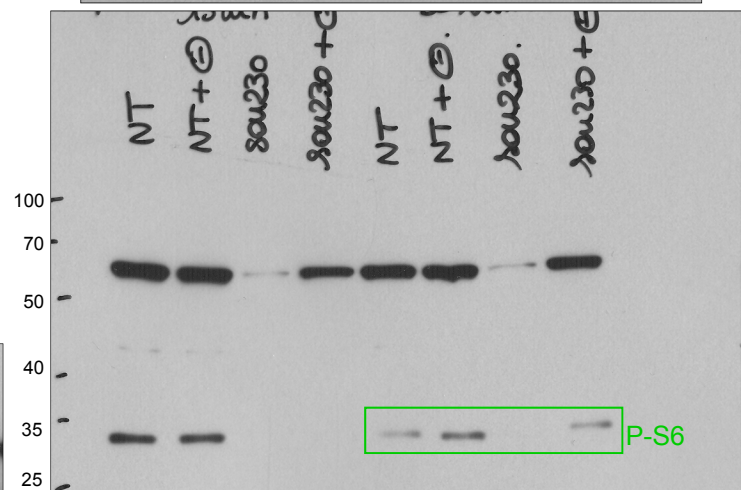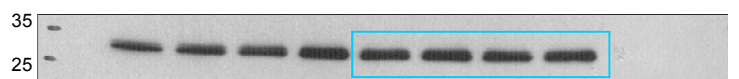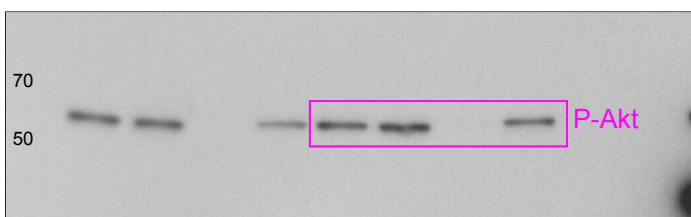

Duluc et al. Figure 4

D

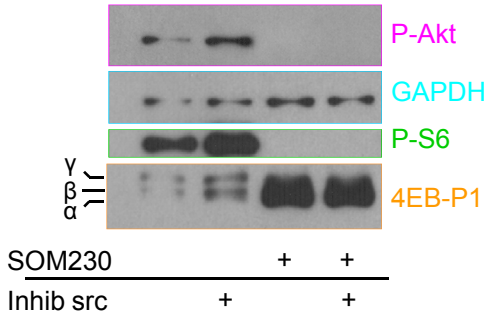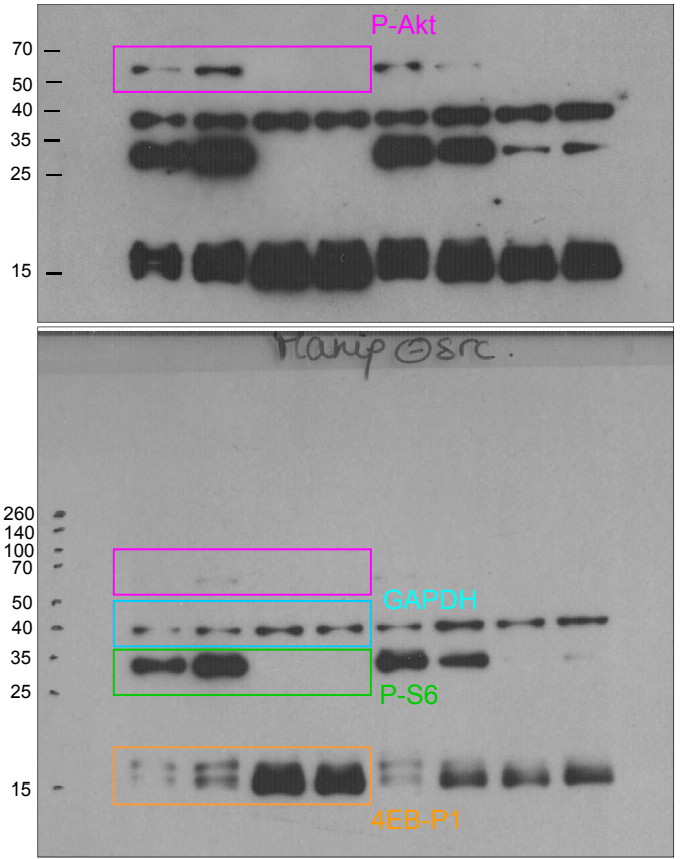

E

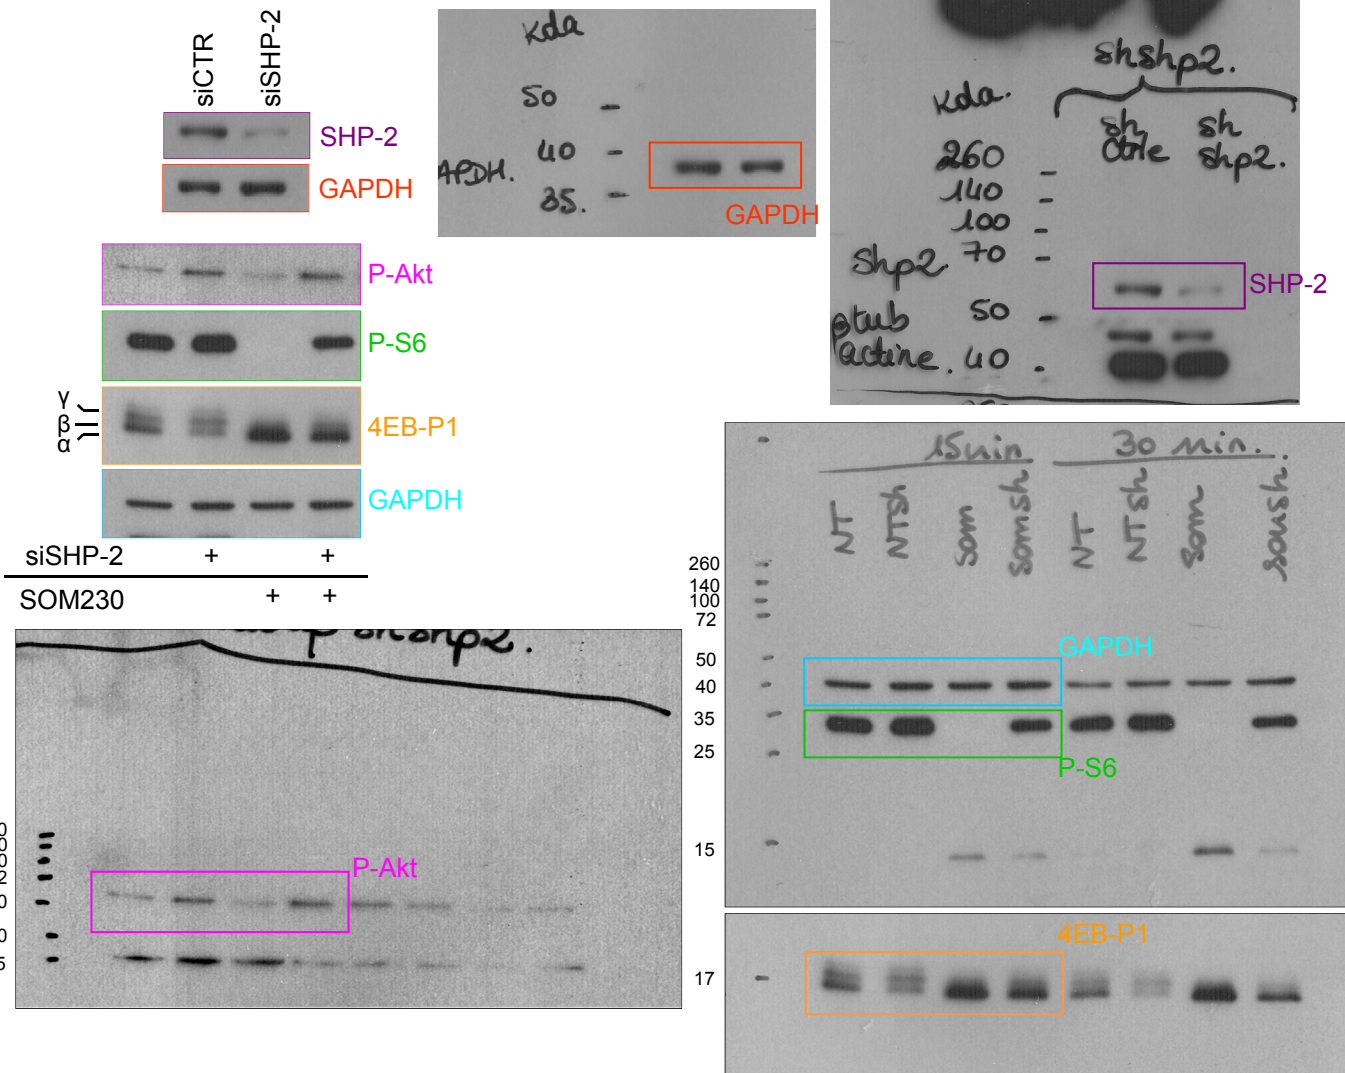

Duluc et al. Figure 4

F

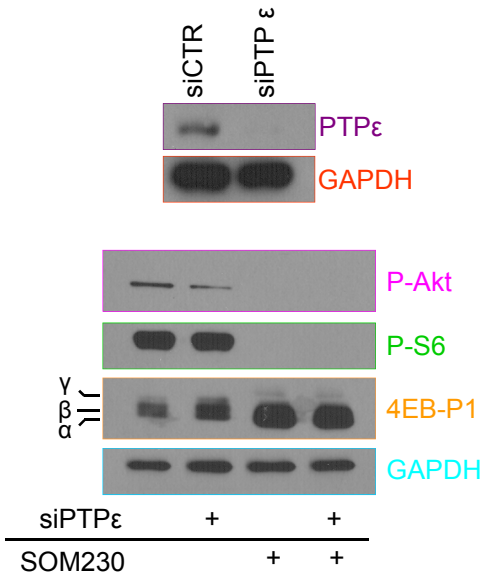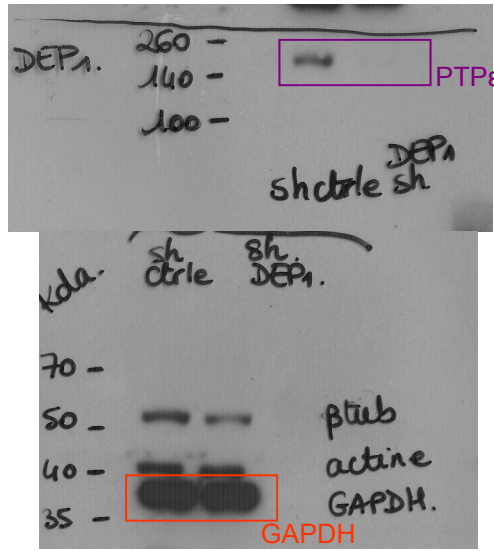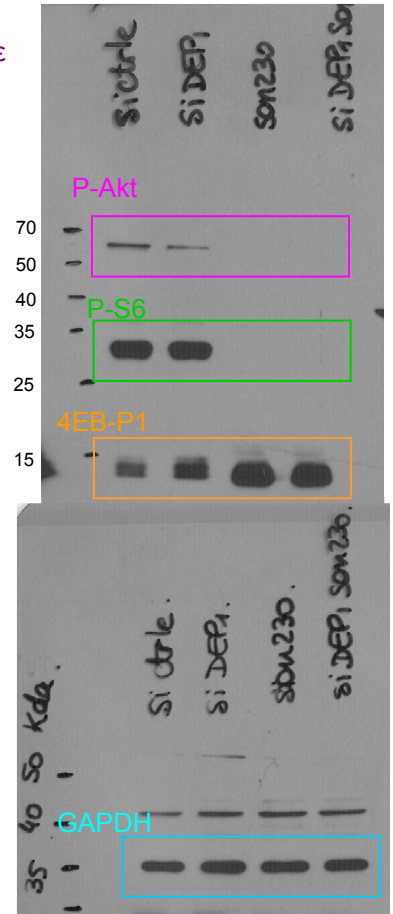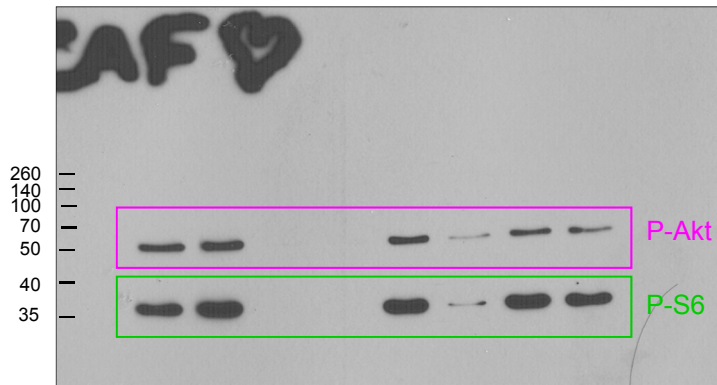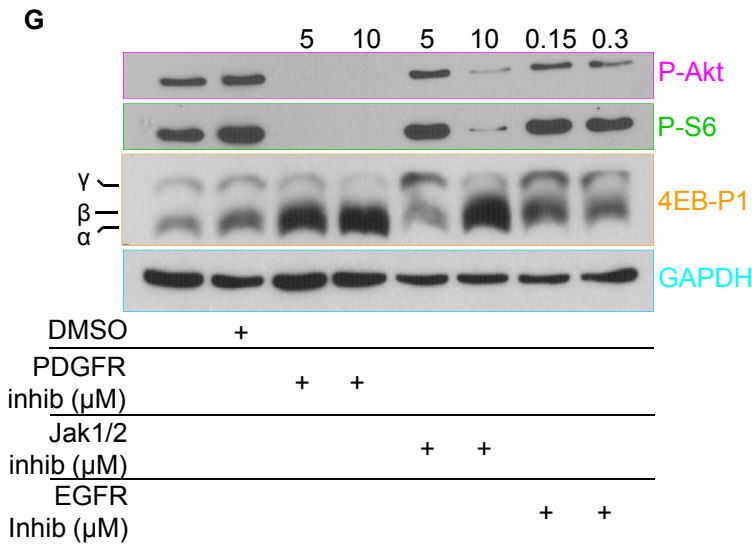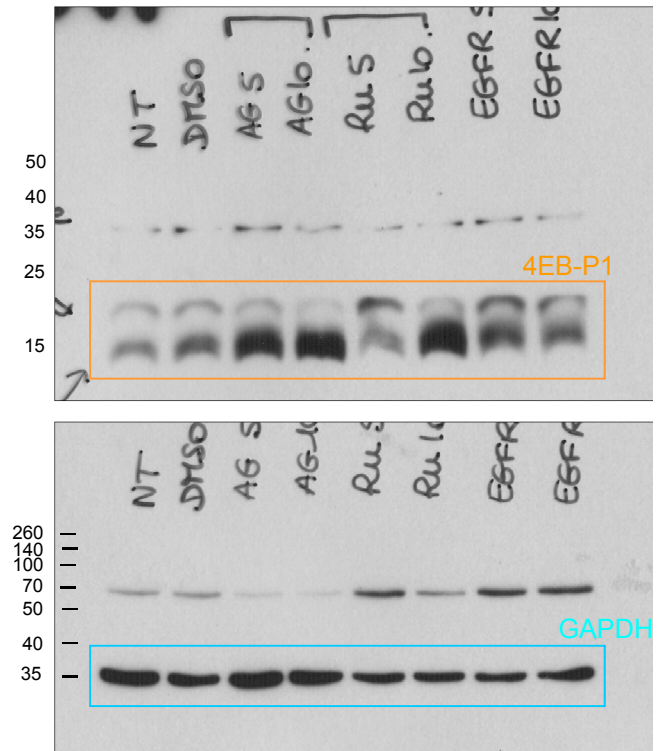

H

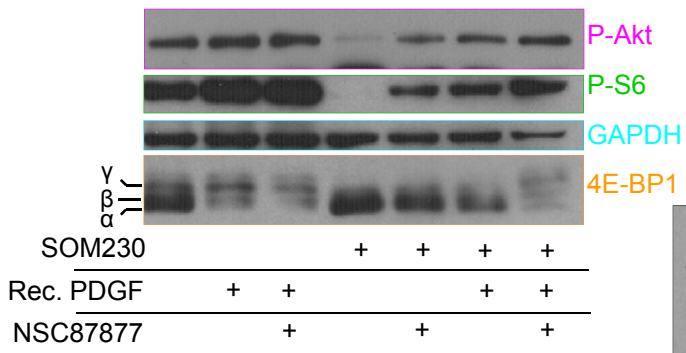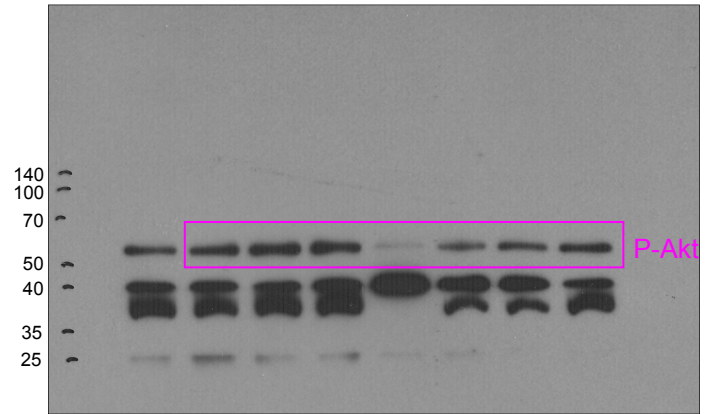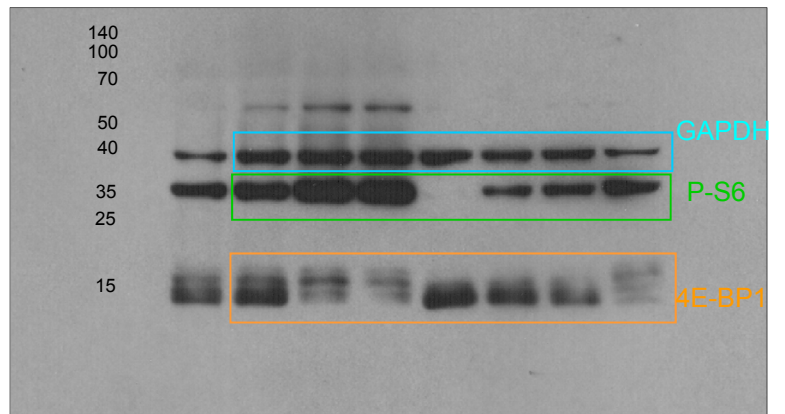

Supplement: emmm0007-0735-sd6.pdf [file emmm0007-0735-sd6.pdf]
