# Supplementary material for: Pharmacological targeting of the protein synthesis mTOR/4E-BP1 pathway in cancer-associated fibroblasts abrogates pancreatic tumour chemoresistance
Source: PubMed Central journal article supplement (PMC4459815; doi:10.15252/emmm.201404346), 2015-04-01

Duluc et al. Figure 1 (high resolution)

F

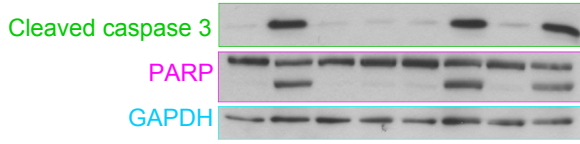

|                       |   |   |   |   |
|-----------------------|---|---|---|---|
| Gemcitabine           | + | + | + | + |
| CAF-CM                |   | + | + |   |
| SOM230-treated CAF-CM |   |   | + | + |
| SOM230                |   |   |   | + |

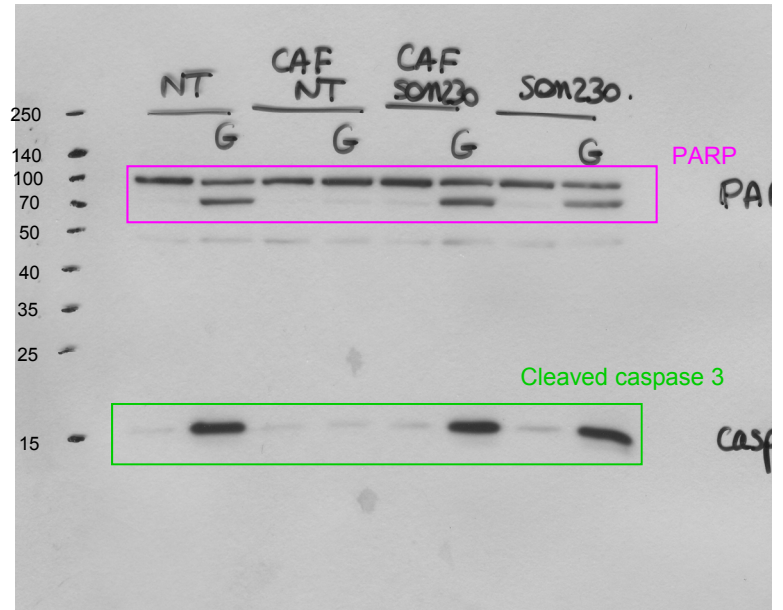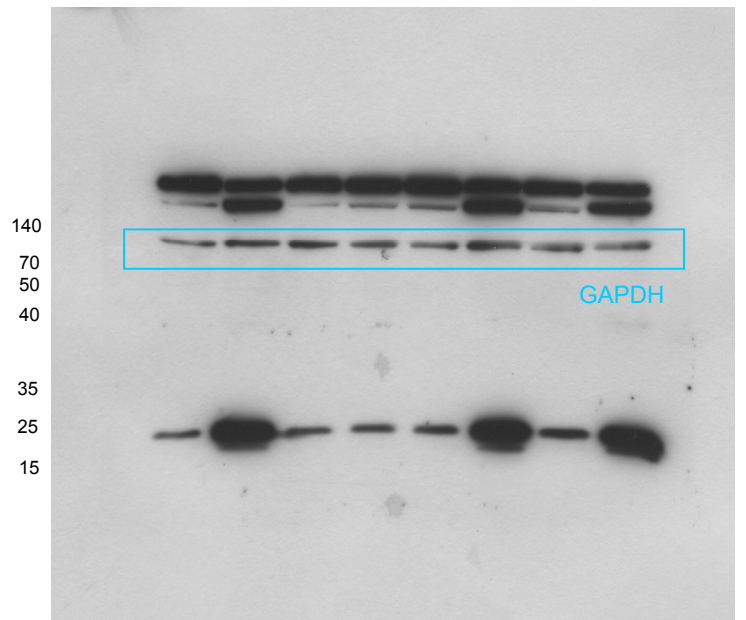

Supplement: emmm0007-0735-sd3.pdf [file emmm0007-0735-sd3.pdf]
